# Supplementary material for: Development of a novel embryonic germline gene-related prognostic model of lung adenocarcinoma
Source: PeerJ journal article supplement (doi:10.7717/peerj.12257), 2021-10-21

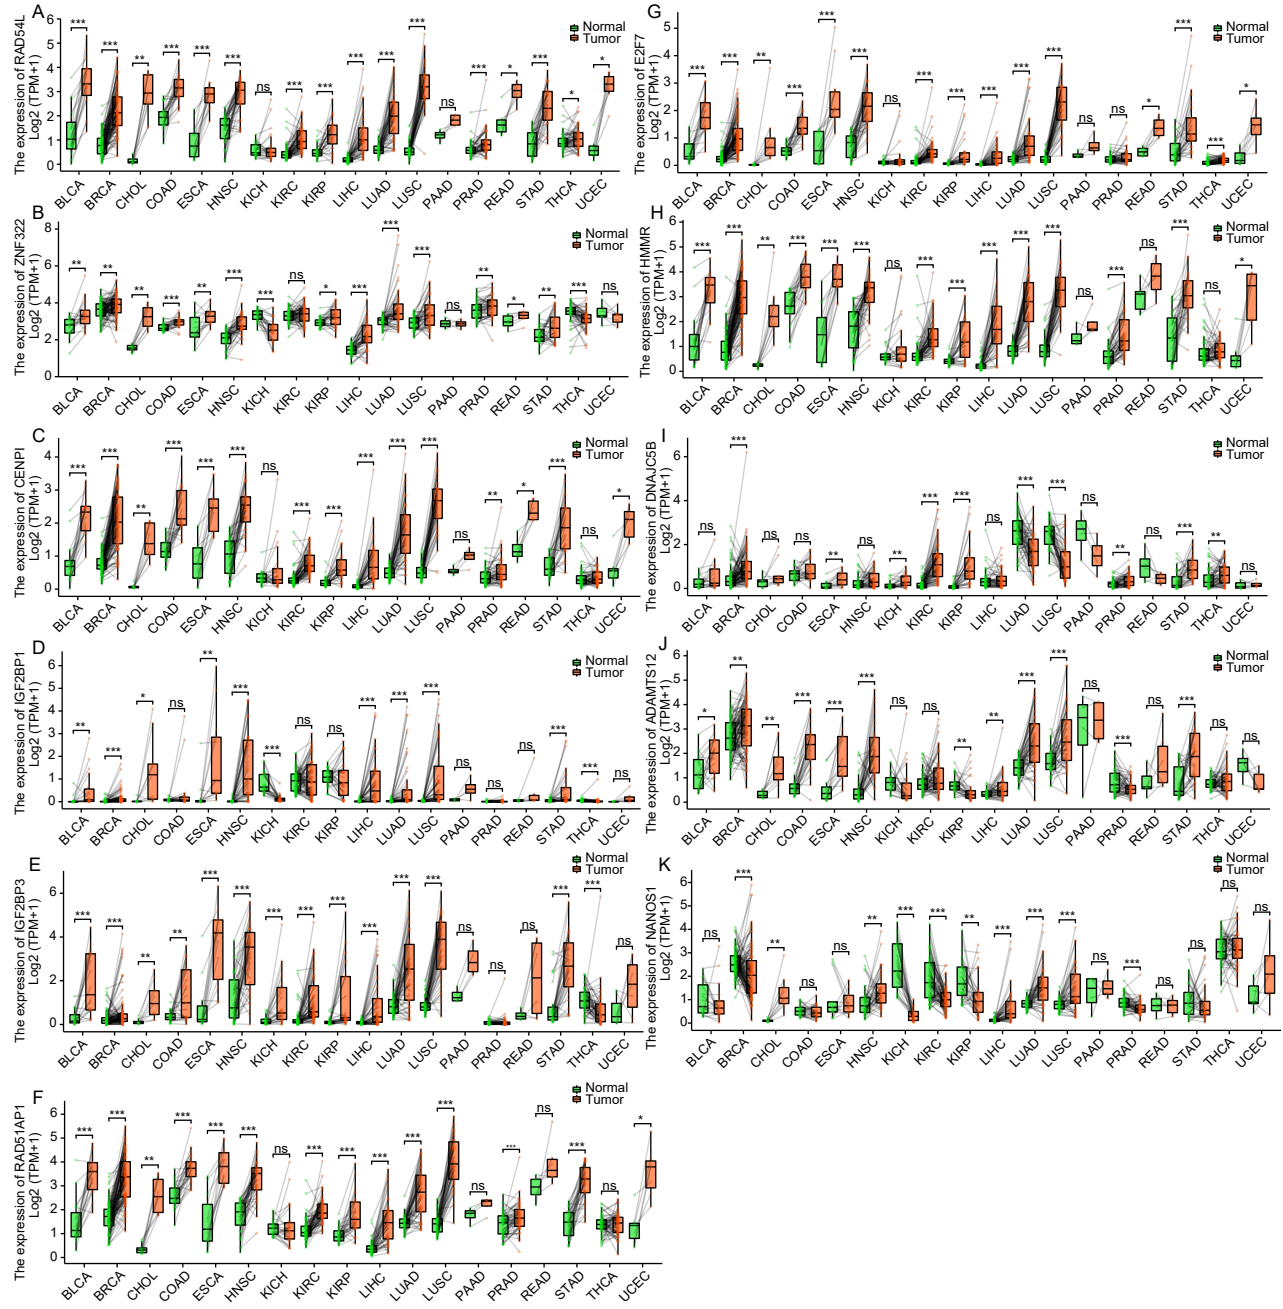

Supplement: Supplementary_figure_S1.pdf [file Supplementary_figure_S1.pdf]
